# Supplementary material for: Individual variability in functional connectivity architecture of the mouse brain
Source: PubMed Central journal article supplement (PMC7718219; doi:10.1038/s42003-020-01472-5), 2020-12-04
Supplement: 42003_2020_1472_MOESM2_ESM.pdf [file 42003_2020_1472_MOESM2_ESM.pdf]

### **Description of Additional Supplementary Files**

File Name: Supplementary Data 1

Description: Parcel-level group and individual similarities

File Name: Supplementary Data 2

Description: Data underlying the article's figures.
